# Supplementary material for: Bibliometric analysis of the 3-year trends (2018–2021) in literature on artificial intelligence in ophthalmology and vision sciences
Source: HighWire-hosted journal article supplement (doi:10.1136/bmjhci-2023-100780), 2024-02-01
Supplement: bmjhci-2023-100780supp002_data_supplement.pdf [file bmjhci-2023-100780supp002_data_supplement.pdf]

**Preparation for Analysis**

The included articles were then exported from DistillerSR. The exported records were matched via DOI with original records in excel to obtain all original data including authorship and citation information. This was done via an SQL query, where all documents with matching DOIs in the original spreadsheet and in the exported spreadsheets were matched, and original spreadsheet rows were extracted. All the data in the Scopus document format was concatenated into a singular spreadsheet which was uploaded to R Bibliometrix and exported from Bibliometrix as a Bibtext file for a more workable file format. Conversion to a Bibtext file format allows for easier production of networks in VOSviewer.
